# Supplementary material for: Selective Depletion of ZAP-Binding CpG Motifs in HCV Evolution
Source: MDPI journal article supplement (doi:10.3390/pathogens12010043), 2022-12-27
Supplement: s1 [file s1]

## Supplementary Material

### Supplementary Figure S1

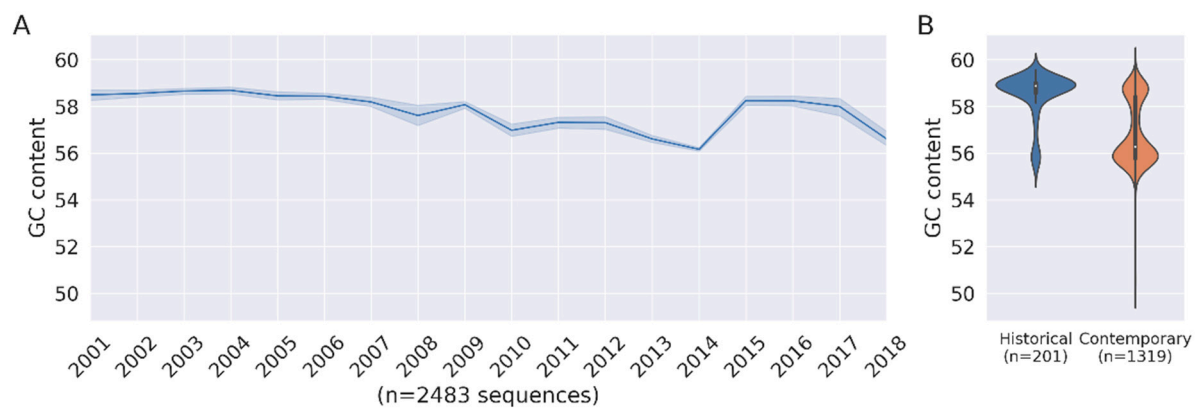

**Figure S1:** GC content of HCV genomes over time: **A.** Line plot showing the GC content of HCV genomes from samples collected during 2001 to 2018, **B.** Violin plots with GC content of historical and contemporary sequences ( $p < 0.0001$ ).

## Supplementary Figure S2

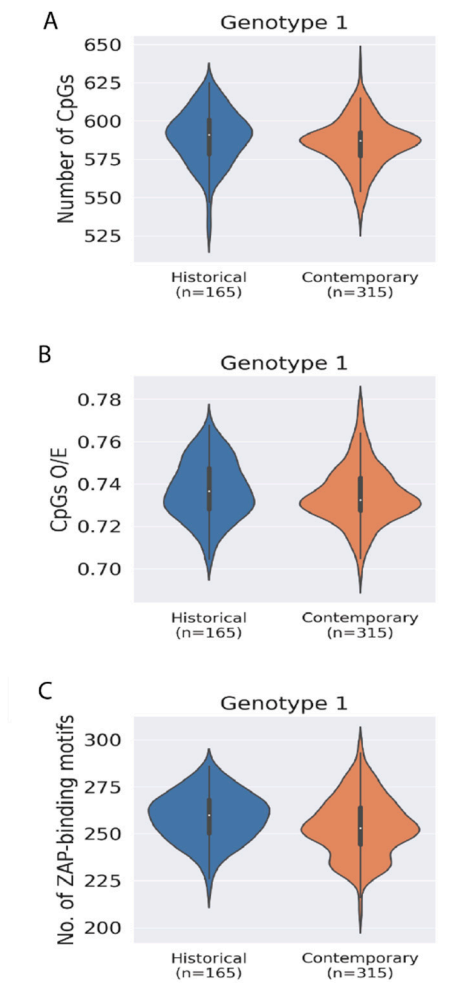

**Figure S2:** Analysis of HCV genotype 1: Violin plots comparing **A.** CpG numbers ( $p = 0.004$ ), **B.** CpG O/E ( $p = 0.04$ ), **C.** Number of ZAP binding motifs ( $p = 0.0002$ ) between historical sequences to contemporary from HCV genotype 1.

## Supplementary Figure S3

```

1  GCCAGCCCCC TGATGGGGGC GACACTCCAC CATGAATCAC TCCCCTGTGA GGAAC TACTG
61  TCTTCACGCA GAAAGCGTCT AGCCATGGCG TTAGTATGAG TGTCGTGCAG CCTCCAGGAC
121 CCCCCCTCCC GGGAGAGCCA TAGTGGTCTG CGGAACCGGT GAGTACACCG GAATTGCCAG
181 GACGACCGGG TCCTTTCTTG GATAAACCCG CTCAATGCCT GGAGATTTGG GCGTGCCCCC
241 GCAAGACTGC TAGCCGAGTA GTGTTGGGTC GCGAAAGGCC TTGTGGTACT GCCTGATAGG
301 GTGCTTGCGA GTGCCCCGGG AGGTCTCGTA GACCGTGCAC CATGAGCACG AATCCTAAAC
361 CTCAAAGAAA AACCAAACGT AACACCAACC GTCGCCCCACA GGACGTC AAG TTCCCGGGTG
421 GCGGTTCAGAT CGTTGGTGGA GTTTA CTTGT TGCCGCGCAG GGGCCCTAGA TTGGGTGTGC
481 GCGCGACGAG GAAGACTTCC GAGCGGTGCG AACCTCGAGG TAGACGTCAG CCTATCCCA
541 AGGCACGTCG GCCCGAGGGC AGGACCTGGG CTCAGCCCGG GTACCCCTTG CCCCTCTATG
601 GCAATGAGGG TTGCGGGTGG GCGGGATGGC TCCTGTCTCC CCGTGGCTCT CGGCCTAGCT
661 GGGGCCCCAC AGACCCCCGG CGTAGGTCG GCAATTTGGG TAAGGTCATC GATACCCTTA
721 CGTGCGGCTT CGCCGACCTC ATGGGGTACA TACCGCTCGT CGGCGCCCT CTTGGAGGCG
781 CTGCAGGGC CCTGGCGCAT GGCGTCCGGG TTCTGGAAGA CGGCGTGAAC TATGCAACAG
841 GGAACCTTCC TGGTTGCTCT TTCTCTATCT TCCTTCTGGC CCTGCTCTCT TGCCTGACTG
901 TGCCCGCTTC AGCCTACCAA GTGCGCAATT CCTCGGGGCT TTACCATGTC ACCAATGATT
961 GCCCTAACTC GAGTATTGTG TACGAGGCGG CCGATGCCAT CCTGCACACT CCGGGGTGTG
1021 TCCCTTGCGT TCGCGAGGGT AACGCCTCGA GGTGTTGGGT GGCGGTGACC CCCACGGTGG
1081 CCACCAGGGA CGGCAAACTC CCCACAA CGC AGCTTCGACG TCATATCGAT CTGCTTGTCTG
1141 GGAGCGCCAC CCTCTGCTCG GCCCTCTACG TGGGGGACCT GTGCGGTCT GTCTTTCTTG
1201 TTGGTCAACT GTTTACCTTC TCTCCAGGC GCCACTGGAC GACGCAAGAC TGCAATTGTT
1261 CTATCTATCC CGGCCATATA ACGGGTCATC GCATGGCATG GGATATGATG ATGAACTGGT
1321 CCCCTACGGC AGCGTTGGTG GTAGTCTCAG TGCTCCGGAT CCCACAAGCC ATCATGGACA
1381 TGTGCTGCTGG TGCTCACTGG GGAGTCTTGG CGGGCATAGC GTATTTCTCC ATGTTGGGGA
1441 ACTGGGCGAA GGTCTGGTA GTGCTGCTGC TATTTGCCGG CGTCGACGCG GAAACCCACG
1501 TCACCGGGGG AAGTGCCGGC CGCACACCG CTGGGCTTGT TGGTCTCCTT ACACCAGGCG
1561 CCAAGCAGAA CATCCAAC TGATCAACACCA ACGGCAGTTG GCACATCAAT AGCACGGCCT
1621 TGAAGTCAA TGAAAGCCTT AACACCGGCT GGTTAGCAGG GCTCTTCTAT CAGCACAAAT
1681 TCAACTCTTC AGGCTGTCTT GAGAGGTTGG CCAGCTGCCG ACGCCTTACC GATTTTGCCC
1741 AGGGCTGGGG TCCTATCAGT TATGCCAACG GAAGCGGCCT CGACGAACGC CCCTACTGCT
1801 GGCATAACC TCACAGACCT TGTGGCATTG TGCCCGCAA GAGCGTGTGT GGCCCGGTAT
1861 ATTGCTTAC TCCAGCCCC GTGGTGGTGG GAACGACCGA CAGGTCGGGC GCGCCTACCT
1921 ACAGCTGGGG TGCAAATGAT ACGGATGTCT TCGTCCCTAA CAACACCAGG CCACCGCTGG
1981 GCAATTGGTT CGGTTGTACC TGGATGAACT CAACTGGATT CACCAAAGTG TGCGGAGCGC
2041 CCCCTTGTGT CATCGGAGGG GTGGGCAACA ACACCTTGCT CTGCCCCACT GATTGTTTCC
2101 GCAAGCATCC GGAAGCCACA TACTCTCGGT GCGGTCCGG TCCCTGGATT ACACCCAGGT
2161 GCATGGTCA CTACCCGTAT AGGCTTTGGC ACTATCCTTG TACCATCAAT TACACCATAT
2221 TCAAAGTCAG GATGTACGTG GGAGGGGTCG AGCACAGGCT GGAAGCGGCC TGCAACTGGA
2281 CGCGGGGCGA ACGCTGTGAT CTGGAAGACA GGGACAGGTC CGAGCTCAGC CCATTGCTGC
2341 TGTCCACCAC ACAGTGGCAG GTCCTTCCGT GTTCTTTTAC GACCCTGCCA GCCTTGTTCA
2401 CCGGCCTCAT CCACCTCCAG CAGAACATTG TGGACGTGCA GTACTTGATC GGGTAGGGT
2461 CAAGCATCGC GTCCTGGGCC ATTAAGTGGG AGTACGTCGT TCTCTGTTC CTCTGCTTG
2521 CAGACGCGCG CGTCTGCTCC TGCTTGTGGA TGATGTTACT CATATCCAA GCGGAGGCGG
2581 CTTTGAGAA CCTCGTAATA CTCAATGCAG CATCCCTGGC CGGGACGCAC GGTCTTGTGT
2641 CCTTCTCGT GTTCTTCTGC TTTGCGTGGT ATCTGAAGGG TAGGTGGGTG CCCGAGCGG
2701 TCTACGCTT CTACGGGATG TGGCCTCTCC TCCTGCTCCT GCTGGCGTTG CCTCAGCGG
2761 CATACTGACT GGACA CGGAG GTGGCCGCGT CGTGTGGCGG CGTTGTTCTT GTCGGGTTAA
2821 TGGCGCTGAC TCTGTGCGCA TATTACAAGC GCTACATCAG CTGGTGCATG TGGTGGCTTC
2881 AGTATTTTCT GACCAGAGTA GAAGCGCAAC TGCACGTGTG GGTCCCCC CTCAACGTCC
2941 GGGGGGGGCG CGATGCGCTC ATCTTACTCA TGTGTGTTGT ACACCCGACT CTGGTATTTG
3001 ACATCACCAA ACTACTCCTG GCCATCTTCG GACCCCTTTG GATTCCTCAA GCCAGTTTGC
3061 TTAAAGTCCC CTACTTCGTG CGCGTTCAAG GCCTTCTCCG GATCTGCGCG CTAGCGCGGA
3121 AGATAGCCGG AGGTCAATTAC GTGCAAATGG CCATCATCAA GTTAGGGGCG CTTACTGGCA
3181 CCTATGTGTA TAACCATCTC ACCCTCTTTC GAGACTGGGC GCACAACGGC CTGCGAGATC
3241 TGGCCGTGGC TGTGGAACCA GTCGTCTTCT CCCGAATGGA GACCAAGCTC ATCAGTGGG
3301 GGGCAGATAC CGCCGCGTGC GGTGACATCA TCAACGGCTT GCGCGTCTCT GCGCGTAGGG

```

3361 GCCAGGAGAT ACTGCTTGGG CCAGCCGACG GAATGGTCTC CAAGGGGTGG AGGTTGCTGG  
3421 CGCCCATCAC GGGGTACGCC CAGCAGACGA GAGGCCTCCT AGGGTGTATA ATCACCAGCC  
3481 TGA CTGGCCG GGACAAAAAC CAAGTGGAGG GTGAGGTCCA GATCGTGTCA ACTGCTACCC  
3541 AAACCTTCCT GGCAACGTGC ATCAATGGGG TATGCTGGAC TGTCTACCC GGGGCCGGAA  
3601 CGAGGACCAT CGCATCACCC AAGGGTCTCTG TCATCCAGAT GTATACCAAT GTGGACCAAG  
3661 ACCTTGTTGG CTGGCCCCGCT CCTCAAGGTT CCCGCTCATT GACACCTGTC ACCTGCGGCT  
3721 CCTCGACCT TTACCTGGTC ACGAGGCACG CCGATGTCAT TCCCGTGCGC CGGCGAGGTG  
3781 ATAGCAGGGG TAGCCTGCTT TCGCCCCGGC CCATTTCTTA CTGTGAAAGGC TCCTCGGGGG  
3841 GTCCGCTGTT GTGCCCCGCG GGACACGCCG TGGGCCTATT CAGGGCCGCG GTGTGCACCC  
3901 GTGGAGTGGC TAAGGCGGTG GACTTTATCC CTGTGGAGAA CCTAGAGACA ACCATGAGAT  
3961 CCCCGGTGTT CACGGACAAC TCCTCTCCAC CAGCAGTGCC CCAGAGCTTC CAGGTGGCCC  
4021 ACCTGCATGC TCCCACCGGC AGCGGTAAGA GCACCAAGGT CCCGCTGCGC TACGCAGCCC  
4081 AGGGCTACAA GGTGTTGGTG CTCAACCCCT CTGTTGCTGC AACGCTGGGC TTTGGTGCTT  
4141 ACATGTCCAA GGCCCATGGG GTTGATCCTA ATATCAGGAC CGGGGTGAGA ACAATTACCA  
4201 CTGGCAGCCC CATCACGTAC TCCACCTACG GCAAGTCTT TGCCGACGGC GGGTGCTCAG  
4261 GAGGTGCTTA TGACATAATA ATTTGTGACG AGTGCCACTC CACGGATGCC ACATCCATCT  
4321 TGGGCATCGG CACTGTCCTT GACCAAGCAG AGACTGCGGG GCGGAGACTG GTTGTGCTCG  
4381 CCACTGCTAC CCCTCCGGGC TCCGTCACGT TGTCCCATCC TAACATCGAG GAGGTTGCTC  
4441 TGTCCACCAC CGGAGAGATC CCTTTTACG GCAAGGCTAT CCCCTCGAG GTGATCAAGG  
4501 GGGGAAGACA TCTCATCTTC TGCCACTCAA AGAAGAAAGT CGACGAGCTC GCCGCGAAGC  
4561 TGGTTCGATT GGGCATCAAT GCCGTGGCCT ACTACCGCGG TCTTGACGTG TCTGTCATCC  
4621 CGACCAGCGG CGATGTTGTC GTCGTGTCGA CCGATGCTCT CATGACTGGC TTTACCGGCG  
4681 ACTTCGACTC TGTGATAGAC TGCAACACGT GTGTCACTCA GACAGTCTGAT TTCAGCCTTG  
4741 ACCCTACCTT TACCATTGAG ACAACCACGC TCCCCCAGGA TGCTGTCTCC AGGACTCAAC  
4801 GCGGGGCGAG GACTGGCAGG GGGAAAGCCAG GCATCTACAG ATTTGTGGCA CCGGGGGAGC  
4861 GCCCTCCGG CATGTTTCGAC TCGTCCGTCC TCTGTGAGTG CTATGACGCG GGTGTGCTT  
4921 GGATGAGCT CACGCCCGCC GAGACTACAG TTAGGCTACG AGCGTACATG AACACCCCGG  
4981 GCTTCCCGT GTGCCAGGAC CATCTTGAAT TTTGGGAGGG CGTCTTTACG GCTTCACTC  
5041 ATATAGATGC CCACTTTCTA TCCCAGACAA AGCAGAGTGG GGAGAACTTT CCTTACCTGG  
5101 TAGCGTACCA AGCCACCGTG TGCGCTAGGG CTCAAGCCCC TCCCCCATCG TGGGACCAGA  
5161 TGTGGAAGTG TTTGATCCGC CTTAAACCCA CCCTCCATGG GCCAACACCC CTGCTATACA  
5221 GACTGGGCGC TGTTTCAAGT GAAGTCAACC TGACGCACCC AATCACCAAA TACATCATGA  
5281 CATGCATGTC GGCCGACCTG GAGGTGCTCA CGAGCACCTG GGTGCTCGTT GCGGCGCTCC  
5341 TGGCTGCTCT GGCCGCGTAT TGCTGTCAA CAGGCTGCGT GGTCTAGTG GGCAGGATTG  
5401 TCTTGTCCGG GAAGCCGGCA ATTATACCTG ACAGGGAGGT TCTCTACCAG GAGTTCGATG  
5461 AGATGGAAGA GTGCTCTCAG CACTTACCGT ACATCGAGCA AGGGATGATG CTCGCTGAGC  
5521 AGTTCAAGCA GAAGGCCCTC GGCTCCTGC AGACCGCGTC CCGCAAGCA GAGGTTATCA  
5581 CCCCTGCTGT CCAGACCAAC TGGCAGAAAC TCGAGGTCTT CTGGGCGAAG CACATGTGGA  
5641 ATTTTCATCAG TGGGATACAA TACTTGGCGG GCCTGTCAAC GCTGCCGTGT AACCCCGCCA  
5701 TTGCTTCATT GATGGCTTTT ACAGCTGCGG TCACCAGCCC ACTAACCCTT GGCCAAACCC  
5761 TCCTCTTCAA CATATTGGGG GGGTGGGTGG CTGCCAGCT CGCCGCCCCC GGTGCCGCTA  
5821 CCGCTTTGT GGGCGCTGGC TTAGCTGGCG CCGCCATCGG CAGCGTTGGA CTGGGGAAGG  
5881 TCCTCGTGGA CATTCTTGCA GGGTATGGCG CCGGCGTGGC GGGAGCTCTT GTAGCATTC  
5941 AGATCATGAG CGGTGAGGTC CCCTCCACGG AGGACCTGGT CAATCTGCTG CCCGCCATCC  
6001 TCTCGCCTGG AGCCCTTGTA GTCGGTGTGG TCTGCGCAGC AATACTGCGC CGGCACGTTG  
6061 GCGCGGGCGA GGGGGCAGTG CAATGGATGA ACCGGCTAAT AGCCTTCGCC TCCCGGGGGA  
6121 ACCATGTTTC CCCCACGCAC TACGTGCGCG AGAGCGATGC AGCCGCCCCG GTCACTGCCA  
6181 TACTCAGCAG CCTCACTGTA ACCCAGCTCC TGAGGCGACT GCATCAGTGG ATAAGCTCGG  
6241 AGTGTAACAC TCCATGCTCC GGTTCCTGGC TAAGGGACAT CTGGGACTGG ATATGCGAGG  
6301 TGCTGAGCGA CTTTAAGACC TGGCTGAAAG CCAAGCTCAT GCCACAACCT CTTGGGATT  
6361 CCTTTGTGTC CTGCCAGCGC GGGTATAGGG GGGTCTGGCG AGGAGACGGC ATTATGCACA  
6421 CTCGCTGCCA CTGTGGAGCT GAGATCACTG GACATGTCAA AAACGGGACG ATGAGGATCG  
6481 TCGGTCCTAG GACCTGCAGG AACATGTGGA GTGGGACGTT CCCCATTAAC GCCTACACCA  
6541 CGGGCCCCCTG TACTCCCTT CCTGCGCCGA ACTATAAGTT CGCGCTGTGG AGGGTGTCTG  
6601 CAGAGGAATA CGTGGAGATA AGGCGGGTGG GGGACTTCCA CTACGTATCG GGTATGACTA  
6661 CTGACAATCT TAAATGCCCC TGCCAGATCC CATCGCCCCG ATTTTTCACA GAATTGGACG  
6721 GGGTGCGCCT ACATAGGTTT GCGCCCCCTT GCAAGCCCTT GCTGCGGGAG GAGGTATCAT  
6781 TCAGAGTAGG ACTCCACGAG TACCCGGTGG GGTGCGCAAT ACCTTGCGAG CCCGAACCGG  
6841 ACGTAGCCGT GTTGACGTCC ATGCTCACTG ATCCCTCCCA TATAACAGCA GAGGCGGCCG  
6901 GGAGAAGGTT GGCGAGAGGG TCACCCCTT CTATGGCCAG CTCCTCGGCC AGCCAGCTGT  
6961 CCGCTCCATC TCTCAAGGCA ACTTGACCCG CCAACCATGA CTCCCTGAC GCCGAGCTCA

7021 TAGAGGCTAA CCTCCTGTGG AGG**CAGGAGA** **TGGGCG**GCAA CATCACCAGG GTTGAGTCAG  
 7081 AGAACAAAGT GGTGATTCTG GACTCCTTCG ATCCGCTTGT GGCAGAGGAG GATGAGCGGG  
 7141 AGGTCTCCGT ACCCGCAGAA ATTCTGCGGA AGTCTCGGAG ATTCGCCCCG GCCCTG**CCCCG**  
 7201 **TTTGGGCGCG** GCCGGACTAC AACCCCCCGC **TAGTAGAGAC** GTGGAAAAAG CCTGACTACG  
 7261 AACCACCTGT GGTCCATGGC TGCCCGCTAC CACCTCCACG GTCCCCCTCCT GTGCCTCCGC  
 7321 CTCGAAAAAA GCGTACGGTG GTCCTCACCG AATCAACCCCT ATCTA**CTGCC** **TTGGCCG**AGC  
 7381 TTGCCACCAA AAGTTTTTGGC AGCTCCTCAA CTTCCGG**CAT** **TACGGGCG**AC AATACGACAA  
 7441 CATCCTCTGA GCCCGCCCCCT TCTGGCTGCC **CCCCGACTC** **CGACG**TTGAG TCCATATTCTT  
 7501 CCATGCCCCC CCTGGAGGGG GAGCCTGGGG ATCCGGAT**CT** **CAGCGACGGG** **TCATGGT**CGA  
 7561 **CGGTC**AGTAG TGGGGCCGAC **ACGGAAGATG** **TCG**TGTGCTG CTCAATGTCT TATT**CCTGGA**  
 7621 **CAGGCG**ACT CGTCACCCCG TCGCTGCGG AAGAACAAAA ACTGCCCATC AACGCATCGA  
 7681 GCAACTCGTT GCTACGCCAT CACAATCTGG TGTATTCCAC CACTTCACGC AGTGCTTGCC  
 7741 AAAGGCAGAA GAAAGTCACA TTTGACAGAC TGCAAGTTCT GGACAGC**CAT** **TACCAGGACG**  
 7801 TGCTCAAGGA GGT**CAAAGCA** **GCGGCG**TCAA AAGTGAAAGC TAACTTGCTA TCCGTAGAGG  
 7861 AAGCTTG**CAG** **CCTGACG**CCC CCACATT**CAG** CCAAA**TCCAA** GTTTGGCTAT GGGG**CAAAAG**  
 7921 **ACG**TCCGTTG CCATG**CCAGA** **AAGGCCG**TAG CCCACATCAA CTCCGTGTGG AAAGACCTTC  
 7981 TGGAAGACAG TGTAACACCA ATAGACACTA CCATCATGGC CAAGAACGAG GTTTTCTGCG  
 8041 TTCAGCCTGA GAAGGGGGGT CGTAAGCCAG CTCGTCTCAT CGTGTT**CCCC** **GACCTGGGCG**  
 8101 TGCGCGTGTG CGAGAAGATG **GCCCTGTACG** **ACG**TGGTTAG CAAG**CTCCCC** **CTGGCCG**TGA  
 8161 TGGGAAGCTC CTACGGATTG CAATACTCAC CAGGACAGCG GGTGAAATTC CTCGTGCAAG  
 8221 CGTGGAAGTC CAAGAAGACC CCGATGGGGT TCTCGTATGA TACCCGCTGT TTTGACTCCA  
 8281 CAGTCACTGA GAGCGACATC CGTACGGAGG AGGCAATTTA CCAATGTTGT GACCTGGACC  
 8341 CCAAGCCCCG CGTGGCCATC AAGTCCCTCA CTGAGAGGCT TTATGTTGGG GGCCCTCTTA  
 8401 CCAATTCAAG GGGGAAAAAC TGCGGCTA**CC** **GCAGGTGCCC** **CGCGAGCGGC** **GTACTGACAA**  
 8461 CTAGCTGTGG TAACACCCTC ACTTGCTACA TCAAGGCCCG GG**CAGCCTGT** **CGAGCCG**CAG  
 8521 GGCTCCAGGA CTGCACCATG **CTCGTGTGTG** **GCGACGACTT** **AGTCG**TTATC TGTGAAAGTG  
 8581 CGGGGGT**CCA** **GGAGGACGCG** GCGAGCCTGA GAGCCTTCAC GGAGGCTATG ACCAGGTACT  
 8641 CCGCCCCCCC CGGGGACCCC CCACAACCAG AATACGACTT GGAGCTTATA ACATCATGCT  
 8701 CCTCCAA**CGT** **GTCAGTCGCC** **CACGACGGCG** CTGGAAAGAG GGTCTACTAC CTTACCCGTG  
 8761 ACCCTACAAC CCCC**CTCGCG** **AGAGCCG**CGT GGGAGACAGC AAGACACACT CCAGTCAATT  
 8821 CCTGGCTAGG CAACATAATC ATGTTTGCCC **CCACACTGTG** **GGCG**AGGATG ATACTGATGA  
 8881 CCCATTTCTT TAGCGTCCTC ATAGCCAGGG ATCAGCTTGA ACAGGCTCTT AACTGTGAGA  
 8941 TCTACGGAGC CTGCTACTCC ATAGAACCAC TGGATCTACC TCCAATCATT CAAAGACTCC  
 9001 ATGGCCTCAG CGCATTTTCA CTCCACAGTT ACTCTCCAGG TGAAATCAAT AGGGTGGCCG  
 9061 CATGCCTCAG AAAACTTGGG GTCCCGCCCT TGCGAGCTTG GAGACACCGG GCCCGGAGCG  
 9121 TCCGCGCTAG GCTTCTGTCC AGAGGAGGCA GGGCTGCCAT ATGTGGCAAG TACCTCTTCA  
 9181 ACTGGGCAGT AAGAACAAAG CTCAAACTCA **CTCCAATAGC** **GGCCGCTGGC** **CGGCTGGACT**  
 9241 TGTCCGGTTG GTTCACGGCT GGCTACAGCG GGGGAGACAT TTATCACAGC GTGTCTCATG  
 9301 CCCGGCCCCG CTGGTTCTGG TTTTGCCTAC TCCTGCTCGC TGCAAGGGTA GGCATCTACC  
 9361 TCCTCCCCAA CCGATGAAGG TTGGGGTAAA CACTCCGGCC TCTTAGGCCA TTTCTGTTTT  
 9421 TTTTTTTTTT TTTTTTTTTT TTTTTTTTTT TTTTTTTTTT TTTTTTTTCT TTTTTTTTTT  
 9481 TTTTTTCTTT TTTTTTTTTT TTTTTTTTCT TTCCTTCTTT TTTCCTTTCT TTTCTTTCTT  
 9541 TCTTTAATGG TGGCTCCATC TTAGCCCTAG TCACGGCTAG CTGTGAAAGG **TCCGTGAGCC**  
 9601 **GCATG**ACTGC AGAGAGTGCT GATACTGGCC TCTCTGCAGA TCATGT

**Figure S3. Analysis of conservation of ZAP-binding motifs in the HCV reference sequence (NC 004102):** Sequences marked in red are ZAP-binding motifs, and the bold sequences are the ZAP-binding motifs that are conserved across at least 75% of the 2616 sequences analysed.
